EXPRESSION OF CONCERN

# Expression of Concern: Brain–Computer Interface–Based Communication in the Completely Locked-In State

The *PLOS Biology* Staff

The editors have become aware of an internal investigation by the authors' institution (Eberhard Karls Universität Tübingen) recommending withdrawal of the manuscript due to alleged breaches of good scientific practice, including selective data selection during data collection. A press release by the authors' institution regarding its findings (in German) can be found [here](#).

The authors have presented to the editors an unofficial translated version of the institution's decision (originally in German) and have informed PLOS that they have appealed the decision. The case was being investigated by the German Research Society (Deutsche Forschungsgemeinschaft; DFG), which has just [released a press release](#) regarding its investigation on Sept 19th 2019.

The journal will be processing this case according to the guidelines provided by the Committee on Publication Ethics (COPE, <https://publicationethics.org>). In the meantime, this Expression of Concern should be taken to indicate that the data and conclusions offered in the study may not be reliable. *PLOS Biology* will take further action, as relevant, after consulting with the authors' institution and the DFG.

## References

1. Chaudhary U, Xia B, Silvoni S, Cohen LG, Birbaumer N (2017) Brain–Computer Interface–Based Communication in the Completely Locked-In State. *PLoS Biol* 15(1): e1002593. <https://doi.org/10.1371/journal.pbio.1002593> PMID: 28141803
2. Chaudhary U, Pathak S, Birbaumer N (2019) Response to: "Questioning the evidence for BCI-based communication in the complete locked-in state". *PLoS Biol* 17(4): e3000063. <https://doi.org/10.1371/journal.pbio.3000063> PMID: 30958815

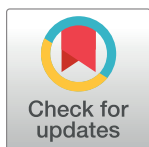

## OPEN ACCESS

**Citation:** The *PLOS Biology* Staff (2019) Expression of Concern: Brain–Computer Interface–Based Communication in the Completely Locked-In State. *PLoS Biol* 17(10): e3000527. <https://doi.org/10.1371/journal.pbio.3000527>

**Published:** October 16, 2019

**Copyright:** © 2019 The PLOS Biology Staff. This is an open access article distributed under the terms of the [Creative Commons Attribution License](#), which permits unrestricted use, distribution, and reproduction in any medium, provided the original author and source are credited.
